# Supplementary material
Source: PubMed Central journal article supplement (PMC3421222)
Supplement: 1206724109_pnas.201206724SI.pdf [file 1206724109_pnas.201206724SI.pdf]

# Supporting Information

Johnson et al. 10.1073/pnas.1206724109

## SI Materials and Methods

**Antibody Generation.** As immunogens, we used unique peptides from the C termini of trace amine-associated receptor (TAAR) 4 (GenPept accession no. NP\_001008499, amino acids 334–347), TAAR5 (GenPept accession no. NP\_001009574, amino acids 321–337), and TAAR6 (GenPept accession no. NP\_778237, amino acids 332–346). The peptides were synthesized by GenScript.

**RNA FISH with Immunohistochemistry.** Fluorescence RNA in situ hybridization combined with immunohistochemistry experiments were performed as previously described (1). We used sense and antisense RNA probes specific for *Taar4*, *Taar5*, and *Taar6* transcripts that were labeled with digoxigenin. The sequences of these probes correspond to nucleotides 1–226 of *Taar4* (GenBank accession no. NM\_001008499), nucleotides 816–1014 of *Taar5* (GenBank accession no. NM\_001009574), and nucleotides 739–988 of *Taar6* (GenBank accession no. NM\_001010828). The probes were detected with sheep anti-digoxigenin-peroxidase. (Roche Applied Science) followed by Cy3 tyramide (PerkinElmer).

**Immunohistochemistry.** Except where indicated, fresh frozen tissue from adult C57/Bl6 mice were sectioned into 14- $\mu$ m sections and fixed with 4% (wt/vol) paraformaldehyde in PBS for 10 min. Slides were then washed 3  $\times$  10 min with PBS, permeabilized and quenched for 30 min in PBS + 0.1% (vol/vol) Triton X-100 (PT) + 0.3% (vol/vol) H<sub>2</sub>O<sub>2</sub>, blocked for 30 min with PT + 5% (vol/vol) donkey serum (PTS), and incubated with 1<sup>o</sup> antibodies overnight at 4  $^{\circ}$ C. Antibodies against TAAR4 and TAAR5 were used at a 1:5,000 dilution and the antibody against TAAR6 at a 1:2,000 dilution in PTS. The antibody against TAAR4 was precleared by incubation overnight at 4  $^{\circ}$ C with fixed HEK239T cells. Secondary antibodies used were either donkey anti-guinea pig Alexa Fluor 488 (Molecular Probes) or donkey anti-guinea pig HRP (Jackson ImmunoResearch) followed by Cy3 tyramide (PerkinElmer). The rabbit anti-TAAR5 antibody was detected with a goat anti-rabbit HRP secondary antibody (Santa Cruz Biotechnology) followed by Alexa Fluor 488 tyramide (Molecular Probes). All secondary antibodies were used 1:1,000 in PTS for 2 h at room temperature. For detection of  $\beta$ -gal, olfactory cell adhesion molecule (OCAM), and vesicular glutamate transporter 2 (VGLUT2), animals were anesthetized and transcardially perfused with 1% (wt/vol) paraformaldehyde in PBS. Primary antibodies used were chicken anti- $\beta$ -gal (ab9361; Abcam) at 1:1,000, goat anti-OCAM (AF774; R&D Systems) at 1:100, and mouse anti-VGLUT2 (ab79157; Abcam) at 1:1,000. Secondary antibodies used were donkey anti-chicken Dylight 549, donkey anti-goat Dylight 488, and donkey anti-mouse Dylight 649, all at 1:500 (Jackson ImmunoResearch). Sections were counterstained with either with DAPI or TOTO-3 iodide (Molecular Probes). Images were taken using a Zeiss LSM 510 DuoScan confocal microscope and were formatted using ImageJ software.

**Glomerular Distribution Maps.** 14  $\mu$ m sections were collected from the entire OB of adult C57/Bl6 mice and stained with antibodies against M71, TAAR4, TAAR5, or TAAR6. The position of the center of each glomerulus was defined as the distance from the anterior tip of the OB (for the *y* axis) and the distance from the midline (for the *x* axis). The OB boundary shown in each plot is for the individual animal. The position of the center of each glomerulus was defined as a percentage of the distance from the anterior tip of the OB to the anterior tip of the AOB (for the *y* axis) and the percentage of the distance from the midline to the

lateral edge of the OB (for the *X*-axis). The boundary of the OB shown in each plot is averaged across all of the mice represented in the plot. 2D histograms of the data were used to generate the smoothed density. Mice were 4–6 wk old. TAAR4: *n* = 9; TAAR5: *n* = 7; TAAR6: *n* = 7; M71: *n* = 8.

**Genotyping *Taar5<sup>LacZ</sup>* Mice.** Mice were genotyped by PCR using primers that recognize the WT *Taar5* allele 1N: GAAGAGC-CTTGTGTGATAGAC; and 2C: CAGAGATGGAAGATGG-AGGTGAG; and the LacZ knockin allele 1N and 3C: GTC-TGTCCTAGCTTCTCACTG.

**Two-Color RNA FISH.** The cRNA riboprobes used matched the full coding regions of *Taar*, *Olfir139*, and *Olfir142* genes (2), and partial coding regions of *Olfir77*, *Olfir821*, and *Olfir1019* genes (3). Two riboprobes matching partial LacZ sequences (1: bp 1–1500; and 2: bp 1501–3000) were combined for enhanced sensitivity. Epifluorescent images were taken using a Leica TCS SP5 II microscope. Brightness and contrast were adjusted to permit adequate visualization of images after printing.

**Whole-Mount X-Gal Staining.** Freshly dissected tissue was incubated (30 min, room temperature) with fixative (1% (vol/vol) formaldehyde, 0.2% (vol/vol) glutaraldehyde, 2 mM MgCl<sub>2</sub>, 5 mM EGTA, 0.02% (vol/vol) Nonidet P-40, and PBS) and washed (PBS containing 0.02% (vol/vol) Nonidet P-40, 3  $\times$  5 min). Tissue was incubated (2–4 h, 37  $^{\circ}$ C, dark) in staining solution [1 mg/mL X-gal, 5 mM K<sub>3</sub>Fe(CN)<sub>6</sub>, 5 mM K<sub>4</sub>Fe(CN)<sub>6</sub>, 2 mM MgCl<sub>2</sub>, 0.01% (wt/vol) sodium deoxycholate, and 0.01% (vol/vol) Nonidet P-40], washed (PBS, 3  $\times$  10 min, room temperature), post-fixed [4% (wt/vol) paraformaldehyde, PBS, 4 to 5 h, 4  $^{\circ}$ C], and stored (80% glycerol, PBS, 4  $^{\circ}$ C).

**Epigenetic Analysis.** The antibodies used were specific for H3 trimethyl lysine-9 (ab8898), H4 trimethyl lysine-20 (ab9051), H3 dimethyl lysine-9 (ab1220) from Abcam, and H3 trimethyl lysine-27 (07-449) from Upstate Chemicals. ChIP-on-chip experiments and data analysis were performed as previously reported (4). Quality control of the ChIP-on-chip data were performed both by NimbleGen (according to their protocols) and by our group. The log<sub>2</sub> (ChIP/input) ratio was normalized in a “weighted global” manner. For peak analysis we used the model-based analysis of 2-color arrays (MA2C) (5), which is a variation of the general sliding window approach. We also confirmed our results by a different algorithm (6). For peak analysis, two different pipelines of existing tools were used: one was for large-organized chromatin K9 modifications (LOCKS) (6), and the other one was the MA2C (5). Both pipelines are variations on the general sliding window approach, but we adjusted the parameters to, especially, search for large-scale enrichment. In the LOCKs method, averaging was performed across 500-bp windows, whereas the minimum block size was 10,000. In the MA2C pipeline, we used the default parameters for peak finding (window of 500 bp, minimum number of probes in a window 5, and maximum gap of 250 bp) and also the adjusted parameters for large domains (window of 10 kb, minimum number of probes 20, maximum gap of 1 kb). A false discovery rate  $\leq 5\%$  was used in both cases.

**Generation of Degenerate Odorant Receptor (OR) Probe for in Situ Hybridization.** Degenerate primers were used to amplify OR sequence segments from TM3–TM6 as previously described (7).



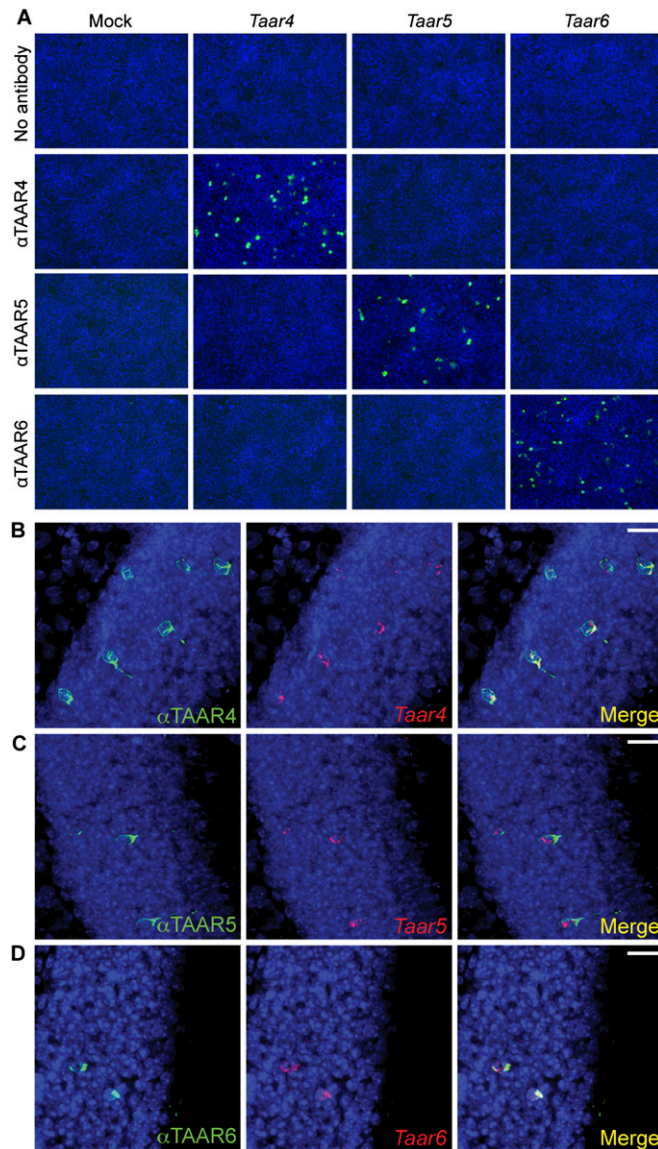

**Fig. S1.** Validation of the specificity of the antibodies against TAAR4, TAAR5, and TAAR6. (A) HEK293 cells were transfected with expression vectors encoding TAAR4, TAAR5, or TAAR6 and stained with the three antibodies. Vertical columns represent HEK293T cells that were transfected either with empty expression vector (Mock) or with an expression vector encoding TAAR4, TAAR5, or TAAR6. Horizontal rows were stained either with no primary antibody or with antibodies specific for TAAR4, TAAR5, or TAAR6. TAAR proteins are stained in green; nuclei are counterstained in blue. (B–D) Histological sections through the main olfactory epithelium were analyzed by immunostaining with the antibodies against TAAR4, TAAR5, or TAAR6 (green) and by RNA in situ hybridization with the specific probes for the corresponding receptors (red). Merged images indicate that in all cases identical neurons are detected by both methods. (B) TAAR4; (C) TAAR5; (D) TAAR6. (Scale bars in B–D, 20  $\mu$ m.)

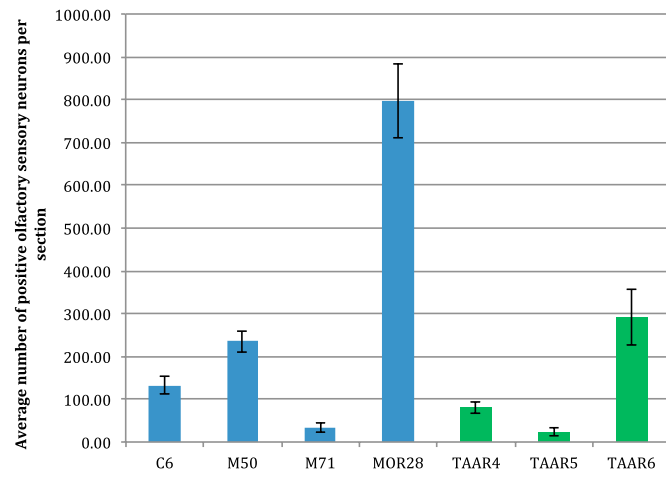

**Fig. S2.** Expression frequencies of various TAARs and ORs in the main olfactory epithelium. The main olfactory epithelia from three adult C57/Bl6 mice were cryosectioned into 14- $\mu$ m sections and stained with antibodies against the ORs C6, M50, M71, and MOR28 and the TAARs TAAR4, TAAR5, or TAAR6. The olfactory sensory neurons expressing each of these chemoreceptors were counted in the six consecutive sections with peak expression. The mean and SD of the numbers of positive neurons were calculated from those six sections.
